# Supplementary material for: Preclinical Pharmacokinetics and Bioavailability of Oxypeucedanin in Rats after Single Intravenous and Oral Administration
Source: MDPI journal article supplement (doi:10.3390/molecules27113570), 2022-06-02
Supplement: s1 [file s1]

# Preclinical Pharmacokinetics and Bioavailability of Oxypeucedanin in Rats after Single Intravenous and Oral Administration

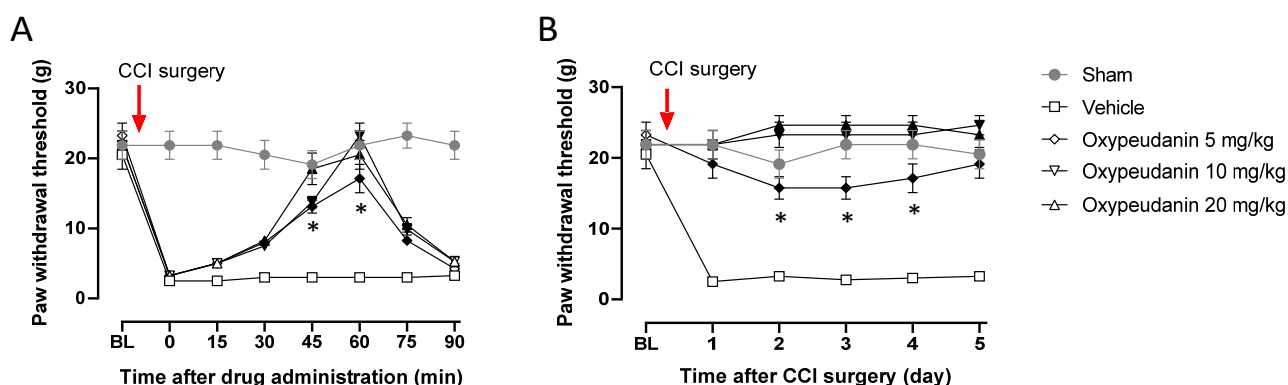

**Figure S1.** Oxypeucedanin dose-dependently exerts strong analgesic effects against chronic neuropathic pain model induced by chronic constricted injury (CCI) in rats. (A) Single intraperitoneal (*i.p.*) injection of oxypeucedanin 5-20 mg/kg significantly increased the paw withdrawal threshold (PWT, indicating the pain sensitivity) from 30-75 min after dosing in CCI rats ( $P<0.001$ ), and the PWT values at 45-60 min in oxypeucedanin 20 mg/kg was higher than that of 5 mg/kg group ( $P<0.05$ ), but was not different from 10 mg/kg group ( $P>0.05$ ). (B) Repeated administration of oxypeucedanin 5-20 mg/kg maintained the analgesic effects for at least 5 days without trend of analgesic tolerance ( $P<0.001$ ). The PWT values at 2-4 days in repeated treatment with oxypeucedanin 20 mg/kg was higher than that of 5 mg/kg group ( $P<0.05$ ), but was not different from 10 mg/kg group. Sham, the sham operation group without any treatment; Vehicle, the CCI rats received vehicle treatment; Oxypeucedanin 5, 10, 20 mg/kg, the CCI rats received treatment of oxypeucedanin 5-20 mg/kg respectively. BL, baseline pain threshold before CCI surgery. The black filled points indicated significant difference compared with the corresponding data from vehicle group ( $P<0.001$ ). Compared to oxypeucedanin 20 mg/kg group,  $*P<0.05$  ( $n=8$ ). This finding indicated that oxypeucedanin 5-20 mg/kg (*i.p.*) can significantly attenuate the mechanical allodynia in neuropathic pain model in rats and oxypeucedanin 10 mg/kg exhibited the maximal analgesic effect in this condition.

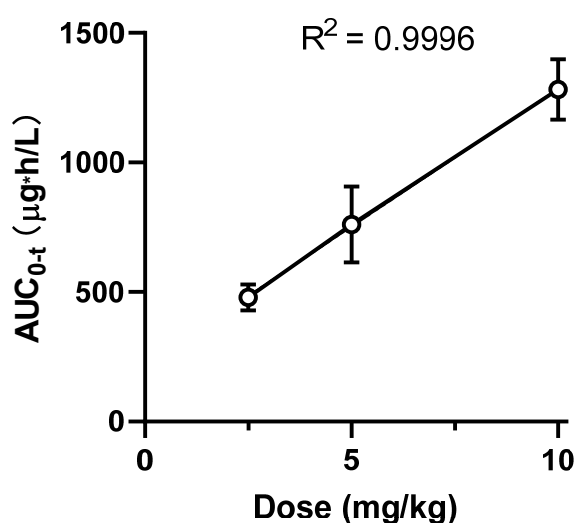

**Figure S2.** The area under the curve of plasma concentration-time ( $\text{AUC}_{0-t}$ ) increased in a dose-proportional manner after intravenous injection of oxypeucedanin. At three dose levels of 2.5, 5, 10 mg/kg, the pharmacokinetic parameter  $\text{AUC}_{0-t}$  showed good linear correlation to dose level with the correlation coefficient ( $R^2$ ) of 0.9996.

**Table S1–S4:** No sex differences were found in pharmacokinetic parameters of oxypeucedanin between male and female rats within the used dose levels.

**Table S1.** *i.v.* 2.5mg/kg.

|                               | male rats (n=4) | female rats (n=4) |
|-------------------------------|-----------------|-------------------|
| AUC <sub>(0-t)</sub> (μg/L*h) | 454.56±93.93    | 500.26±244.04     |
| AUC <sub>(0-∞)</sub> (μg/L*h) | 459.60±90.94    | 501.75±243.00     |
| MRT (h)                       | 0.52±0.35       | 0.72±0.12         |
| T <sub>1/2Z</sub> (h)         | 0.62±0.27       | 0.60±0.09         |
| V <sub>Z</sub> (L/kg)         | 4.50±2.08       | 4.98±2.33         |
| CL <sub>Z</sub> (L/h/kg)      | 5.14±0.68       | 5.64±1.89         |
| C <sub>2min</sub> (μg/L)      | 1266.68±507.59  | 878.17±359.03     |

**Table S2.** *i.v.* 5mg/kg.

|                               | male rats (n=4) | female rats (n=4) |
|-------------------------------|-----------------|-------------------|
| AUC <sub>(0-t)</sub> (μg/L*h) | 753.30±162.22   | 1027.19±639.99    |
| AUC <sub>(0-∞)</sub> (μg/L*h) | 754.83±161.99   | 1029.05±694.85    |
| MRT (h)                       | 0.55±0.17       | 0.88±0.21         |
| T <sub>1/2Z</sub> (h)         | 0.64±0.09       | 0.67±0.18         |
| V <sub>Z</sub> (L/kg)         | 6.28±1.20       | 7.50±3.32         |
| CL <sub>Z</sub> (L/h/kg)      | 6.91±1.80       | 10.19±6.83        |
| C <sub>2min</sub> (μg/L)      | 1493.17±916.49  | 1222.27±738.0     |

**Table S3.** *i.v.* 10mg/kg.

|                               | male rats (n=4) | female rats (n=4) |
|-------------------------------|-----------------|-------------------|
| AUC <sub>(0-t)</sub> (μg/L*h) | 1146.95±330.94  | 1417.13±306.76    |
| AUC <sub>(0-∞)</sub> (μg/L*h) | 1160.44±342.48  | 1437.39±298.04    |
| MRT (h)                       | 0.69±0.21       | 0.91±0.05         |
| T <sub>1/2Z</sub> (h)         | 0.56±0.23       | 0.66±0.18         |
| V <sub>Z</sub> (L/kg)         | 6.97±1.82       | 7.12±3.36         |
| CL <sub>Z</sub> (L/h/kg)      | 9.16±2.49       | 7.21±1.68         |
| C <sub>2min</sub> (μg/L)      | 1822.59±579.03  | 1512.29±281.62    |

**Table S4.** *i.g.* 20mg/kg.

|                               | male rats (n=4) | female rats (n=4) |
|-------------------------------|-----------------|-------------------|
| AUC <sub>(0-t)</sub> (μg/L*h) | 321.78±76.13    | 188.24±82.99      |
| AUC <sub>(0-∞)</sub> (μg/L*h) | 378.64±73.14    | 217.96±105.59     |
| MRT (h)                       | 5.76±3.23       | 5.96±1.10         |
| T <sub>1/2Z</sub> (h)         | 3.77±2.82       | 2.45±1.36         |
| V <sub>Z/F</sub> (L/kg)       | 285.07±227.73   | 319.35±29.34      |
| CL <sub>Z/F</sub> (L/h/kg)    | 54.08±9.77      | 105.44±43.15      |
| C <sub>max</sub> (μg/L)       | 76.86±54.85     | 53.42±10.26       |
